# Supplementary material for: Aptamer Cocktail to Detect Multiple Species of Mycoplasma in Cell Culture
Source: Int J Mol Sci. 2020 May 27;21(11):3784. doi: 10.3390/ijms21113784 (PMC7312096; doi:10.3390/ijms21113784)
Supplement: Supplementary file 1 [file ijms-21-03784-s001.pdf]

**Table S1** Sequence information of aptamers.

| Aptamer name   | Aptamer sequence (5'-3')                                                                                 | Length (base) |
|----------------|----------------------------------------------------------------------------------------------------------|---------------|
| A15-1          | GTG GGG TTG AAA ACG CCG GAG AGG GTG TGT GGG TGG GGT A                                                    | 40            |
| A16-1Y         | TGG GTG GGG TTG TCG CTA GGG GTT TAA GGG GTC GTC GTG A                                                    | 40            |
| #1J            | ATC CAG AGT GAC GCA GCA GCC AAC GTG CTT TCT ACC TTA<br>TTT TCC GTC ACT CTC ACT CTG GAC ACG GTG GCT TAG T | 76            |
| L14-2          | CCG ATT CTA CGG AGT GAA GGC CCT TTA GGG CCG GTA CCG C                                                    | 40            |
| L7-2           | GTA ACC GGT TGT CTG GGG TTT CGG TGT GGG AGA AAG ATG G                                                    | 40            |
| Random library | ATC CAG AGT GAC GCA GCA-[N] <sub>40</sub> -TGG ACA CGG TGG CTT AGT                                       | 76            |

Note: [N]<sub>40</sub> indicates 40 random bases; All the labels including fluorescence dyes and biotin are modified at the 5'-terminal of those sequences.

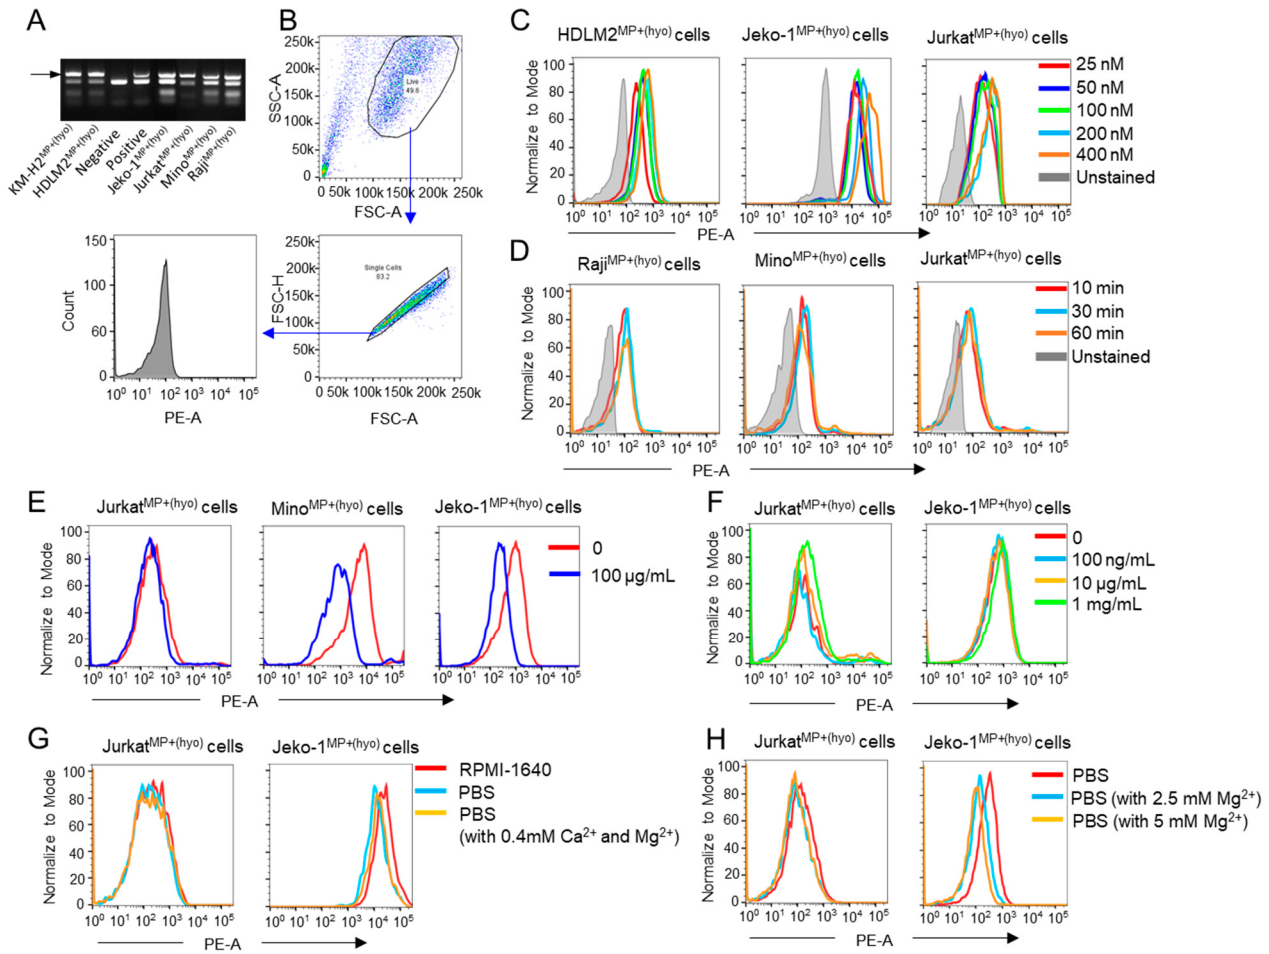

**Figure S1.** Optimizing cell binding conditions of A15-1 aptamer. The optimal cell binding buffer, bind concentration, and binding time of A15-1 aptamer are 1X PBS (without tRNA, BSA,  $\text{Mg}^{2+}$ , or  $\text{Ca}^{2+}$ ), 50 nM, and 10 min. **(A)** Mycoplasma-infected cells confirmed by PCR assays. The PCR amplicons were analyzed by 2% agarose gel electrophoresis, and the samples in each lane were indicated below; Arrows shows the PCR amplicons of mycoplasma DNA; **(B)** Gate strategy of flow cytometry assays; **(C)** Test cells were incubated with different concentrations of A15-1 aptamer as indicated in RPMI-1640 binding buffer (RPMI-1640 medium supplied with 1 mg/mL BSA and 0.1 mg/mL tRNA) for 30 min. Resultant cell binding was evaluated by flow cytometry; **(D)** The cells were incubated with 50 nM A15-1 aptamer in RPMI-1640 binding buffer for 10, 30, or 60 min, and changes in cell binding affinity was examined by flow cytometry; **(E-H)** PBS-washed cells were incubated with 50 nM A15-1 aptamer in following binding buffer for 10 min, and then the binding affinity was tested by using flow cytometry: **(E)** RPMI-1640 binding buffer or tRNA-free RPMI-1640 binding buffer; **(F)** RPMI-1640 medium supplied with different concentration of BSA; **(G)** RPMI-1640 medium, PBS, or PBS supplied with 0.4 mM  $\text{Mg}^{2+}$  and  $\text{Ca}^{2+}$ ; **(H)** PBS, PBS with 2.5 mM or 5 mM  $\text{Mg}^{2+}$ . Data show the representative results from three independent experiments with similar findings.

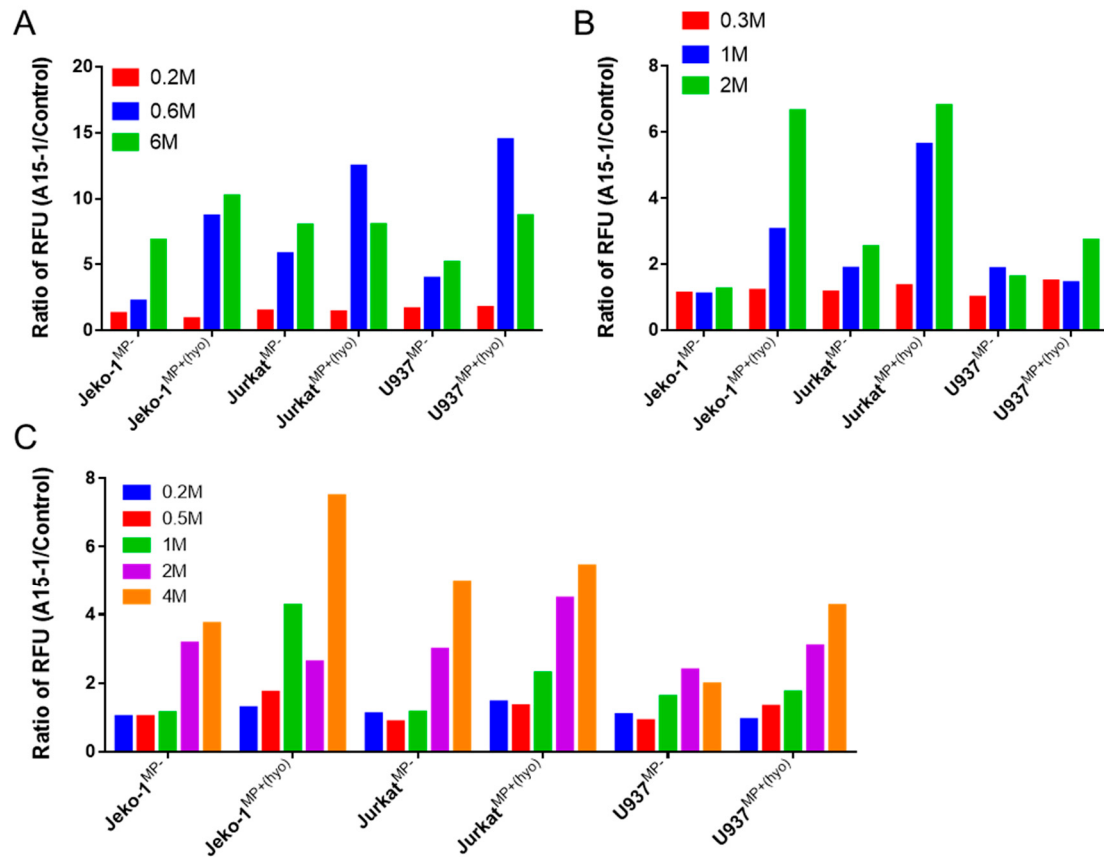

**Figure S2.** Cell count affects relative fluorescence unit ratios between Cy3-labeled A15-1 and control (L14-2) aptamer-bound cells. Different amounts of *M. hyorhina* positive (MP<sup>+(hyo)</sup>) or mycoplasma negative (MP<sup>-</sup>) Jeko-1, Jurkat, or U937 cells were collected and incubated with either Cy3-labeled A15-1 or control aptamer. After washing cells by 0.01% Tween-20 containing 1×PBS once, the fluorescence intensities of those cells were measured using a microplate reader. **(A)** The cell counts are 0.2, 0.6, and 6 million; **(B)** The cell counts are 0.3, 1, and 2 million; **(C)** The cell counts are 0.2, 0.5, 1, 2, 4 million.

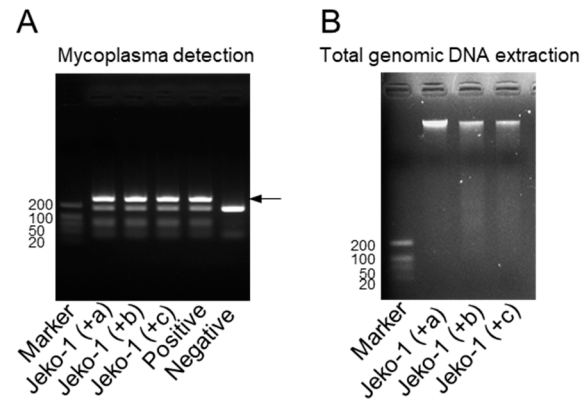

**Figure S3.** Verification of mycoplasma contamination and total DNA isolation. (A) Different species of mycoplasmas were detected using a PCR assay. Arrow shows the PCR amplicons of mycoplasma DNA (B) The isolated total DNA including cell DNA and mycoplasma DNA was verified using agarose gel electrophoresis.

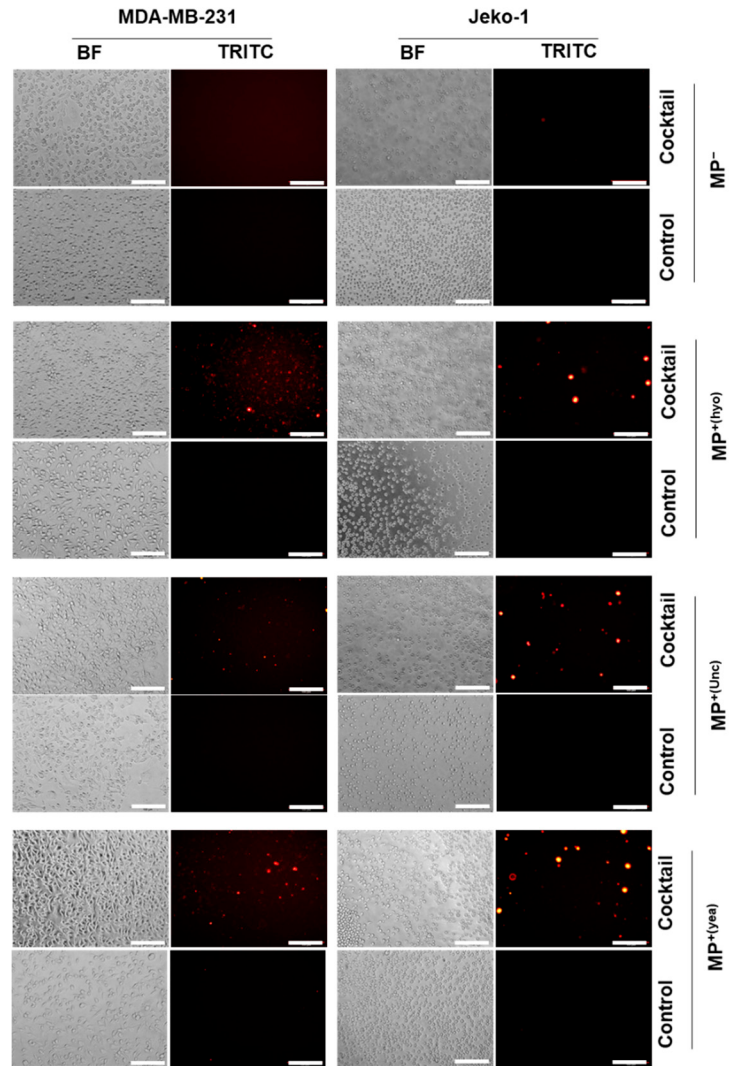

**Figure S4.** Fluorescence imaging for Cy3-labeled aptamer cocktail- or control (L14-2) aptamer-bound MDA-MB-231 and Jeko-1 cells. MDA-MB-231 cells ( $1 \times 10^5$ /well) were seeded into a 48-well plate, and  $1 \times 10^6$ /ml of Jeko-1 cells were seeded into a T25 flask for overnight culture. Then, cells were infected with different species of mycoplasma for further culture. Forty-eight hours later,  $2 \times 10^5$ /sample of Jeko-1 cells were harvested and washed with  $1 \times$  PBS once, while MDA-MB-231 cells were washed with  $1 \times$  PBS in wells once. After that, cells were incubated with 100 nM of either Cy3-labeled aptamer cocktail or Cy3-labeled L14-2 in  $1 \times$  PBS for 10 min, followed by washing with  $1 \times$  PBS once. Jeko-1 cells were transferred into a 96-well plate. The fluorescence of those cells was observed by using a fluorescence microscope. Scale bar = 100  $\mu$ m. BF, bright field; MP<sup>-</sup>, mycoplasma negative; MP<sup>+(hyo)</sup>, *M. hyorhinis* positive; MP<sup>+(Unc)</sup>, unclassified mycoplasma negative; MP<sup>+(yea)</sup>, mixed mycoplasma positive

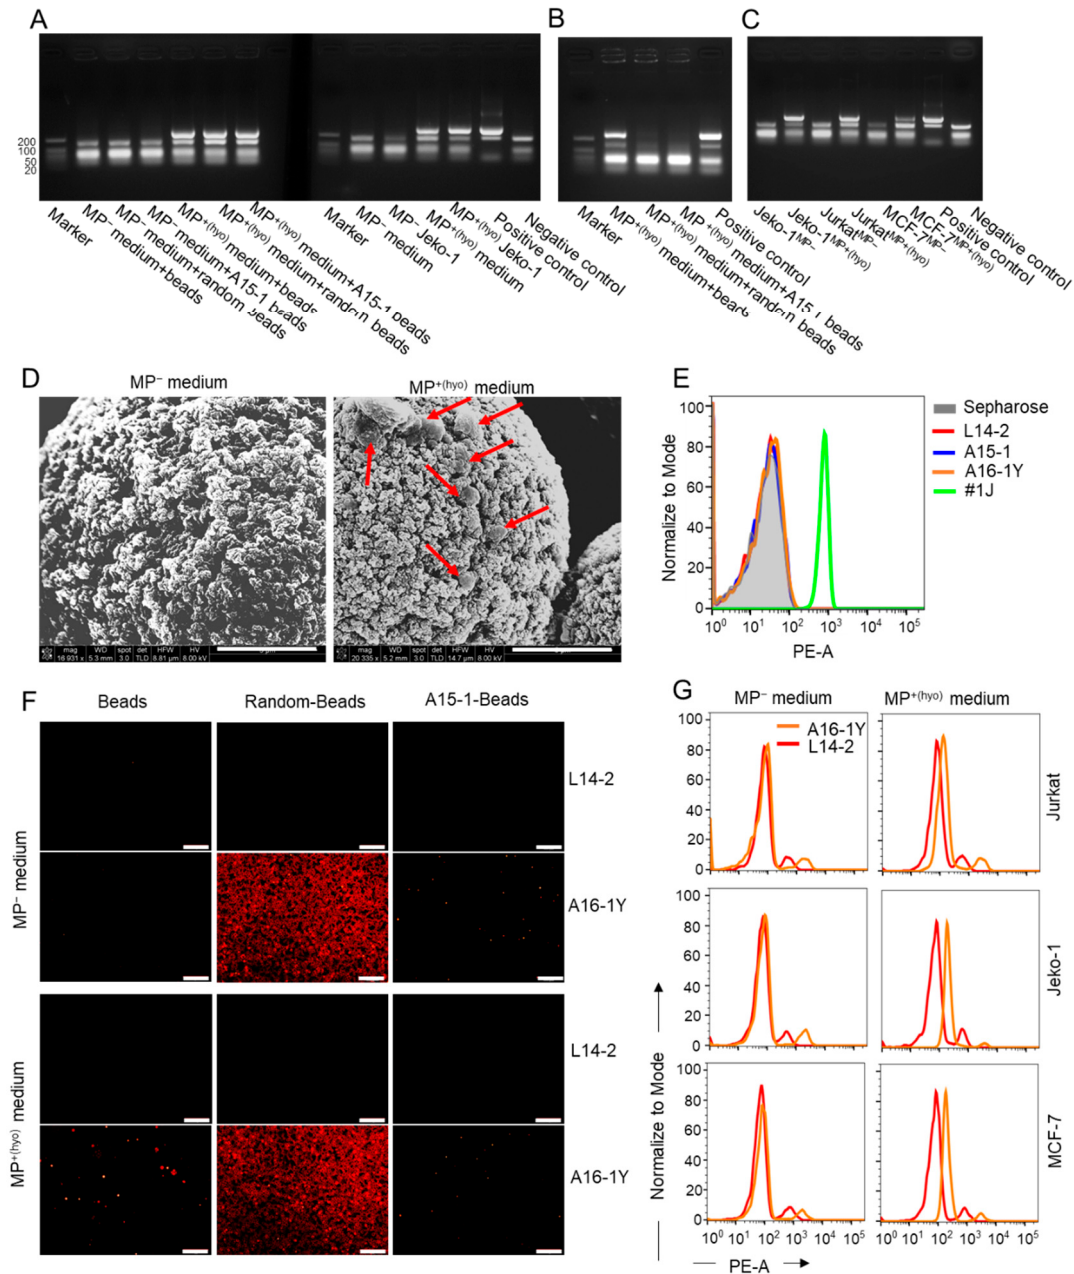

**Figure S5.** Streptavidin-immobilized sepharose capture mycoplasma from contaminated cell culture supernatant. (A-C) Mycoplasma detection for cell culture supernatant and cell culture supernatant-incubated sepharoses using PCR assays; (D) SEM micrographs of sepharose-adherent mycoplasma. The scale bar for MP<sup>-</sup> medium and MP<sup>+(hyo)</sup> medium is 5 μm. Red arrows show mycoplasma attachment to streptavidin-immobilized sepharose; (E) Binding affinity test for L14-2, A15-1, A16-1Y, and #1J aptamers to streptavidin-immobilized sepharose; (F) Fluorescence images for *M. hyorhinis*-adherent sepharose after incubating with Cy3-labeled A16-1Y or L14-2 aptamer. Streptavidin-immobilized sepharose (beads), random ssDNA linked sepharose (random-beads), and A15-1 aptamer-linked sepharose (A15-1-beads) were incubated with different cell culture supernatant samples containing either Cy3-labeled A16-1Y or L14-2 aptamer. Fluorescence was observed using a fluorescence microscope. The scale bar for those fluorescence images is 500 μm; (G) MP<sup>-</sup> or MP<sup>+(hyo)</sup> cell culture medium were incubated with streptavidin-immobilized sepharose and either Cy3-labeled A16-1Y or L14-2 aptamer. The binding of Cy3-labeled A16-1Y to the sepharose was tested using a flow cytometer. MP<sup>-</sup>, mycoplasma negative; MP<sup>+(hyo)</sup>, *M. hyorhinis* positive.

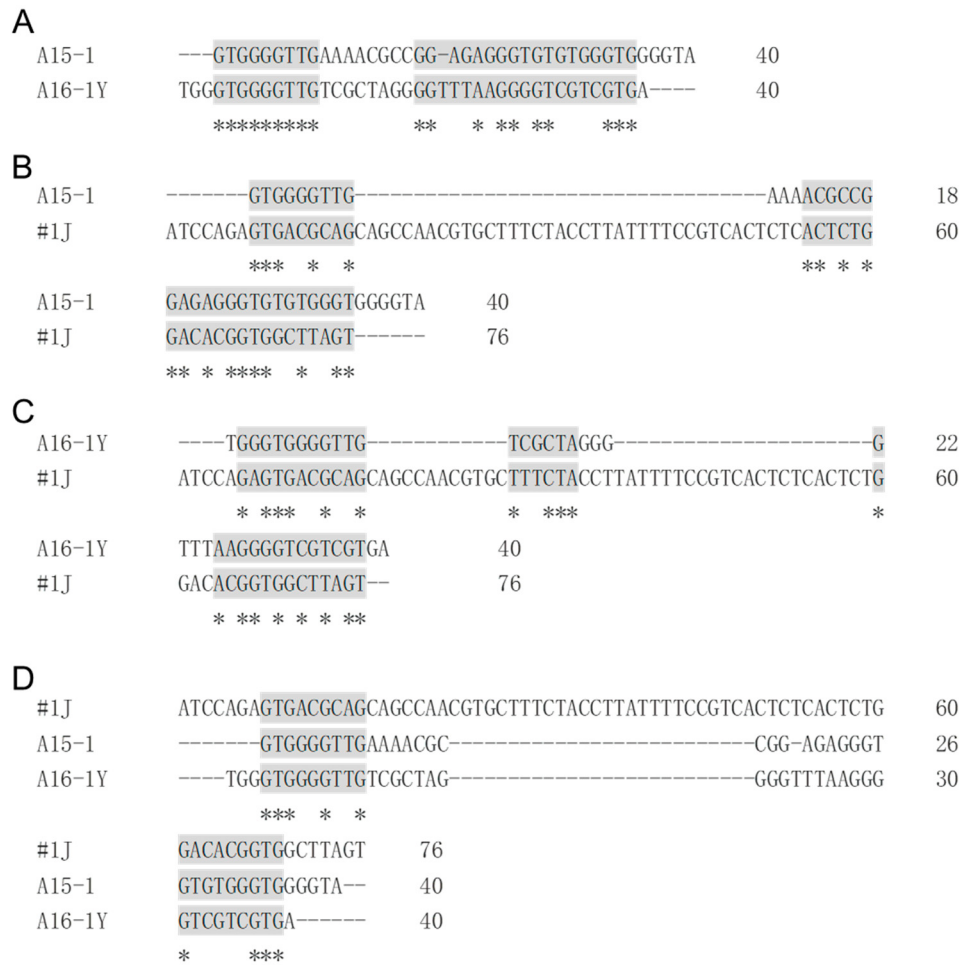

**Figure S6.** Sequence alignment analysis for A15-1, A16-1Y, and #1J aptamers. Sequence alignment for A15-1 and A16-1Y (**A**), A15-1 and #1J (**B**), A16-1Y and #1J (**C**), and A15-1, A16-1Y and #1J (**D**). Sequences with gray background in each alignment result are the similar motifs. Asterisk indicates the identical bases. Sequences were aligned by using the Clustal Omega (version 1.2.4) online tool (<https://www.ebi.ac.uk/Tools/msa/clustalo/>).
